# Supplementary material for: Probiotic Aspergillus oryzae produces anti-tumor mediator and exerts anti-tumor effects in pancreatic cancer through the p38 MAPK signaling pathway
Source: PubMed Central journal article supplement (PMC8154913; doi:10.1038/s41598-021-90707-4), 2021-05-26
Supplement: 41598_2021_90707_MOESM1_ESM.pdf [file 41598_2021_90707_MOESM1_ESM.pdf]

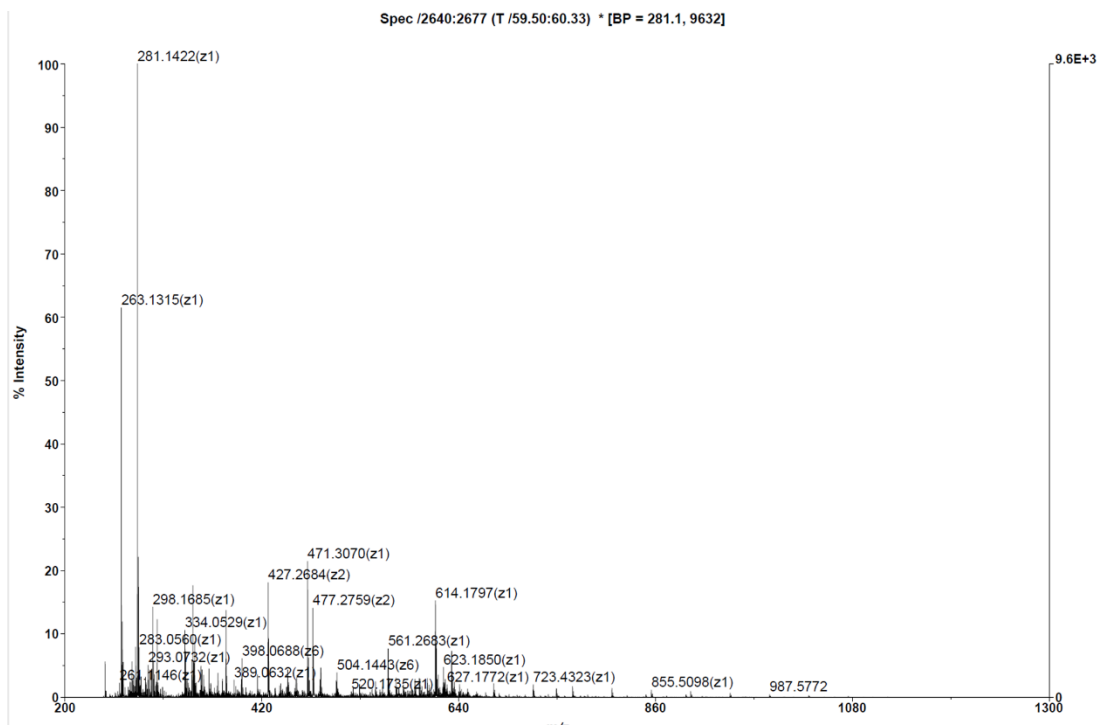

**Supplementary Figure 1. The spectrum of isolated fraction by LC-MS analysis**

An LC-MS analysis showed the mass of the molecule contained in the final fraction.

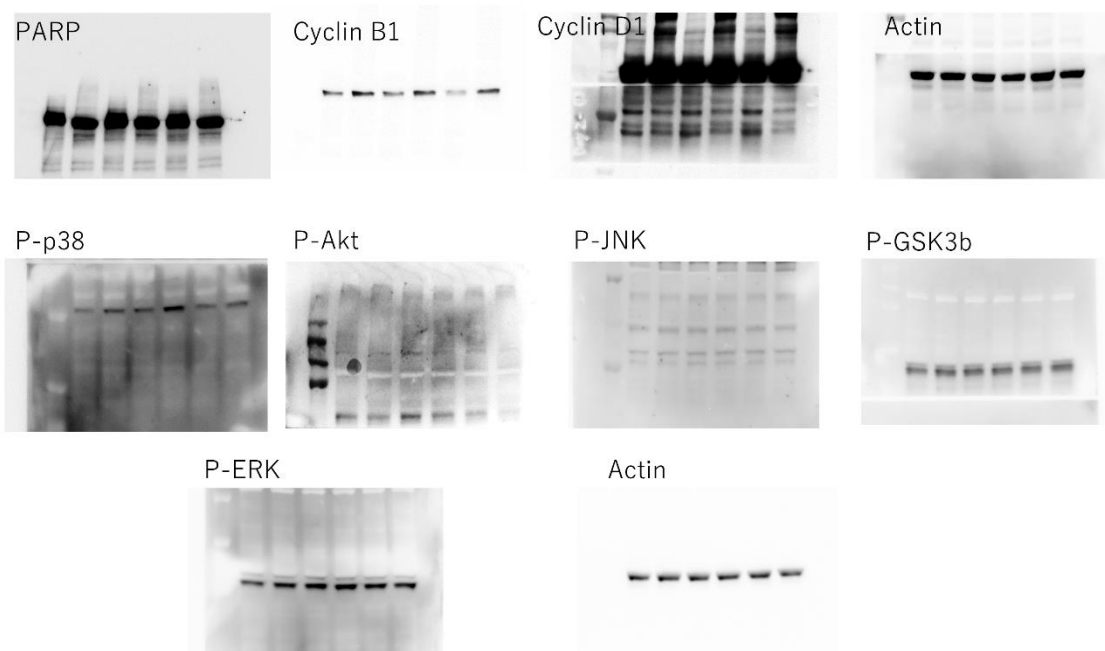

**Supplementary Figure 2. Unprocessed images of western blots**
